# Supplementary material
Source: publisher site journal article supplement (https://www.spandidos-publications.com/1876/downloadSupplementary)
Supplement: Supplementary file 1 [file downloadSupplementary]

## Sheet: Supplementary table 3
Table SIII. Definitions of gene abbreviations in Figure 5
Gene Symbol	Gene Name
AKT1	AKT serine/threonine kinase 1
AP-1	AP-1 transcription factor subunit
ARHGEF12	Rho guanine nucleotide exchange factor 12
ASC	PYD and CARD domain containing
BCL10	BCL10 immune signaling adaptor
BCL3	BCL3 transcription coactivator
CALM1	calmodulin 1
CARD9	caspase recruitment domain family member 9
CASP1	caspase 1
CASP8	caspase 8
CBLB	Cbl proto-oncogene B
CCL17	C-C motif chemokine ligand 17
CCL22	C-C motif chemokine ligand 22
CHUK	component of inhibitor of nuclear factor kappa B kinase complex
CLEC1B	C-type lectin domain family 1 member B
CLEC2	C-type lectin domain family 1 member B
CLEC4D	C-type lectin domain family 4 member D
CLEC4E	C-type lectin domain family 4 member E
CLEC4M	C-type lectin domain family 4 member M
CLEC6A	C-type lectin domain containing 6A
CLEC7A	C-type lectin domain containing 7A
CNK1	connector enhancer of kinase suppressor of Ras 1
Cox-2	prostaglandin-endoperoxide synthase 2
CYLD	CYLD lysine 63 deubiquitinase
DC-SIGN	CD209 molecule
DECTIN-1	C-type lectin domain containing 7A
DECTIN-2	C-type lectin domain containing 6A
EGR2	early growth response 2
ERK	Extracellular regulated kinases
FCER1G	Fc fragment of IgE receptor Ig
HRAS	HRas proto-oncogene, GTPase
IKBA	NFKB inhibitor alpha
IKBKE	inhibitor of nuclear factor kappa B kinase subunit epsilon
IKBKG	inhibitor of nuclear factor kappa B kinase regulatory subunit gamma
IKKA	Inhibitor of nuclear factor kappa-B kinase subunit alpha
IKKB	Inhibitor of nuclear factor kappa-B kinase subunit beta
IL10	interleukin 10
IL12A	interleukin 12A
IL17D	interleukin 17D
IL1B	interleukin 1 beta
IL2	interleukin 2
IL23A	interleukin 23 subunit alpha
IL-27	interleukin 27
IL6	interleukin 6
IP3R	inositol 1,4,5-trisphosphate receptor type 1
IP3R	inositol 1,4,5-trisphosphate receptor type 1
IRF1	interferon regulatory factor 1
IRF9	interferon regulatory factor 9
ITPR1	inositol 1,4,5-trisphosphate receptor type 1
JNK	c-Jun N-terminal kinase
JUN	Jun proto-oncogene, AP-1 transcription factor subunit
KSR1	kinase suppressor of ras 1
LARG	Rho guanine nucleotide exchange factor 12
LSP1	lymphocyte specific protein 1
MALT1	MALT1 paracaspase
MAP3K14	mitogen-activated protein kinase kinase kinase 14
MAPK1	mitogen-activated protein kinase 1
MAPK14	mitogen-activated protein kinase 14
MAPK8	mitogen-activated protein kinase 8
MAPKAPK2	MAPK activated protein kinase 2
MCL	C-type lectin domain family 4 member D
MDM2	MDM2 proto-oncogene
MINCLE	C-type lectin domain family 4 member E
MK2	MAPK activated protein kinase 2
NEMO	NF-kappa-B essential modulator
NFAT	nuclear factor of activated T cells
NFATC1	nuclear factor of activated T cells 1
NFKB1	nuclear factor kappa B subunit 1
NFKB2	nuclear factor kappa B subunit 2
NFKBIA	NFKB inhibitor alpha
NLRP3	NLR family pyrin domain containing 3
PAK1	p21 (RAC1) activated kinase 1
PI3K	phosphatidylinositol-4,5-bisphosphate 3-kinase catalytic subunit
PIK3CA	phosphatidylinositol-4,5-bisphosphate 3-kinase catalytic subunit alpha
PKB	Protein kinase B
PLCG2	phospholipase C gamma 2
PLK3	polo like kinase 3
PPP3CA	protein phosphatase 3 catalytic subunit alpha
PRKCD	protein kinase C delta
PTGS2	prostaglandin-endoperoxide synthase 2
PTPN11	protein tyrosine phosphatase non-receptor type 11
PYCARD	PYD and CARD domain containing
RAF1	Raf-1 proto-oncogene, serine/threonine kinase
RAS	ras oncogene
RELA	RELA proto-oncogene, NF-kB subunit
RELB	RELB proto-oncogene, NF-kB subunit
RHOA	ras homolog family member A
SHP2	protein tyrosine phosphatase non-receptor type 11
SRC	SRC proto-oncogene, non-receptor tyrosine kinase
STAT1	signal transducer and activator of transcription 1
STAT2	signal transducer and activator of transcription 2
SYK	spleen associated tyrosine kinase
TNF	tumor necrosis factor
